# Supplementary material for: Resolving the true sodium storage sites in hard carbon: the essential role of hydrogen termination
Source: Royal Society of Chemistry journal article supplement (doi:10.1039/d5ta08433d), 2025-12-09
Supplement: d5ta08433d1.pdf [file d5ta08433d1.pdf]

## Supplementary Information

### Resolving the True Sodium Storage Sites in Hard Carbon: The Essential Role of Hydrogen Termination

*Li Zhong<sup>1,2,4</sup>, Yifang Li<sup>1,2,4</sup>, Xingqiao Wu<sup>1,2,4</sup>, Sean C. Smith<sup>3</sup>, Shulei Chou<sup>1,2,4\*</sup>, Xin Tan<sup>1,2,4\*</sup>*

<sup>1</sup> Institute for Carbon Neutralization Technology, College of Chemistry and Materials Engineering, Wenzhou University, Wenzhou, Zhejiang 325035, China.

<sup>2</sup> Zhejiang Provincial Key Laboratory of Advanced Battery Materials and Technology, Wenzhou University Technology Innovation Institute for Carbon Neutralization, Wenzhou, Zhejiang 325035, China.

<sup>3</sup> Integrated Materials Design Laboratory, Department of Materials Physics, Research School of Physics, Australian National University, Canberra, ACT 2601, Australia.

<sup>4</sup> Zhejiang-Australia International Joint Laboratory for Sodium-Ion Batteries, Wenzhou University Technology Innovation Institute for Carbon Neutralization, Wenzhou, Zhejiang 325035, China.

\* Corresponding authors: Shulei Chou; Xin Tan

E-mail: [chou@wzu.edu.cn](mailto:chou@wzu.edu.cn); [xintan@wzu.edu.cn](mailto:xintan@wzu.edu.cn)

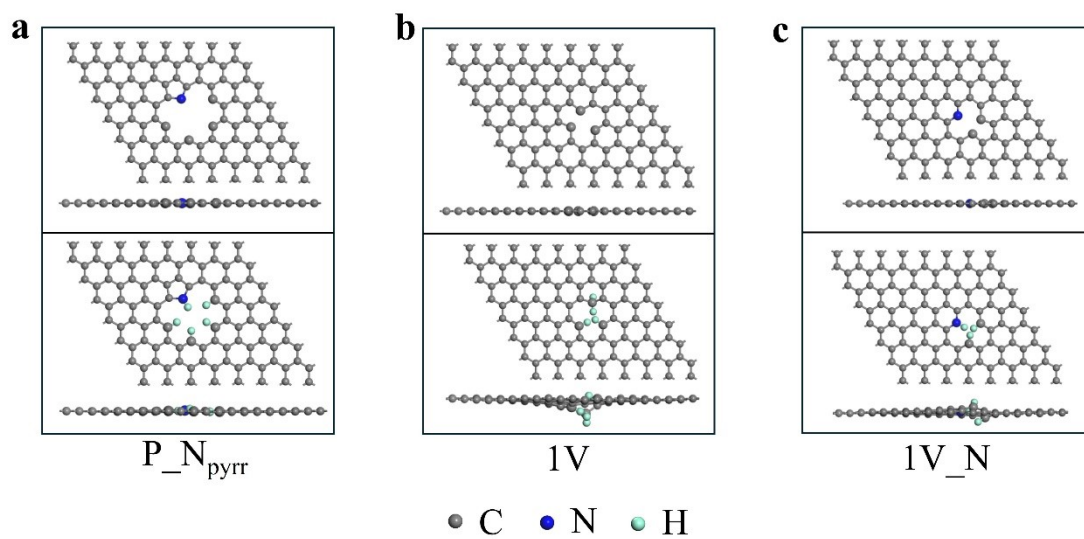

**Figure S1.** Structural models of HC before(top) and after (bottom) H-term. (a) P\_N<sub>pyr</sub>, (b) 1V, and (c) 1V\_N.

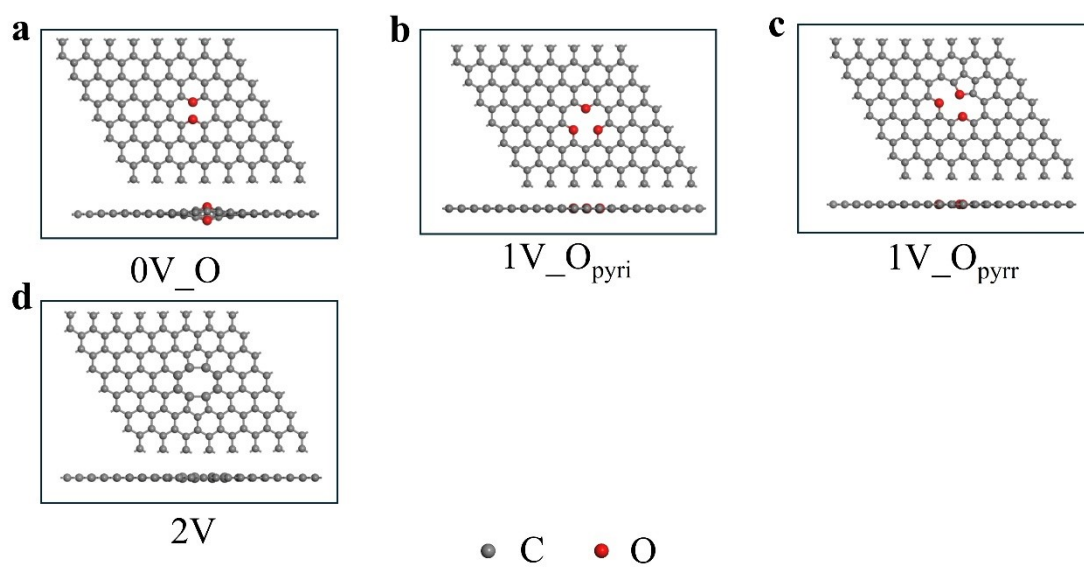

**Figure S2.** Structural models of HC. (a) 0V\_O, (b) 1V\_O<sub>pyr</sub>, (c) 1V\_O<sub>pyr</sub>, and (d) 2V.

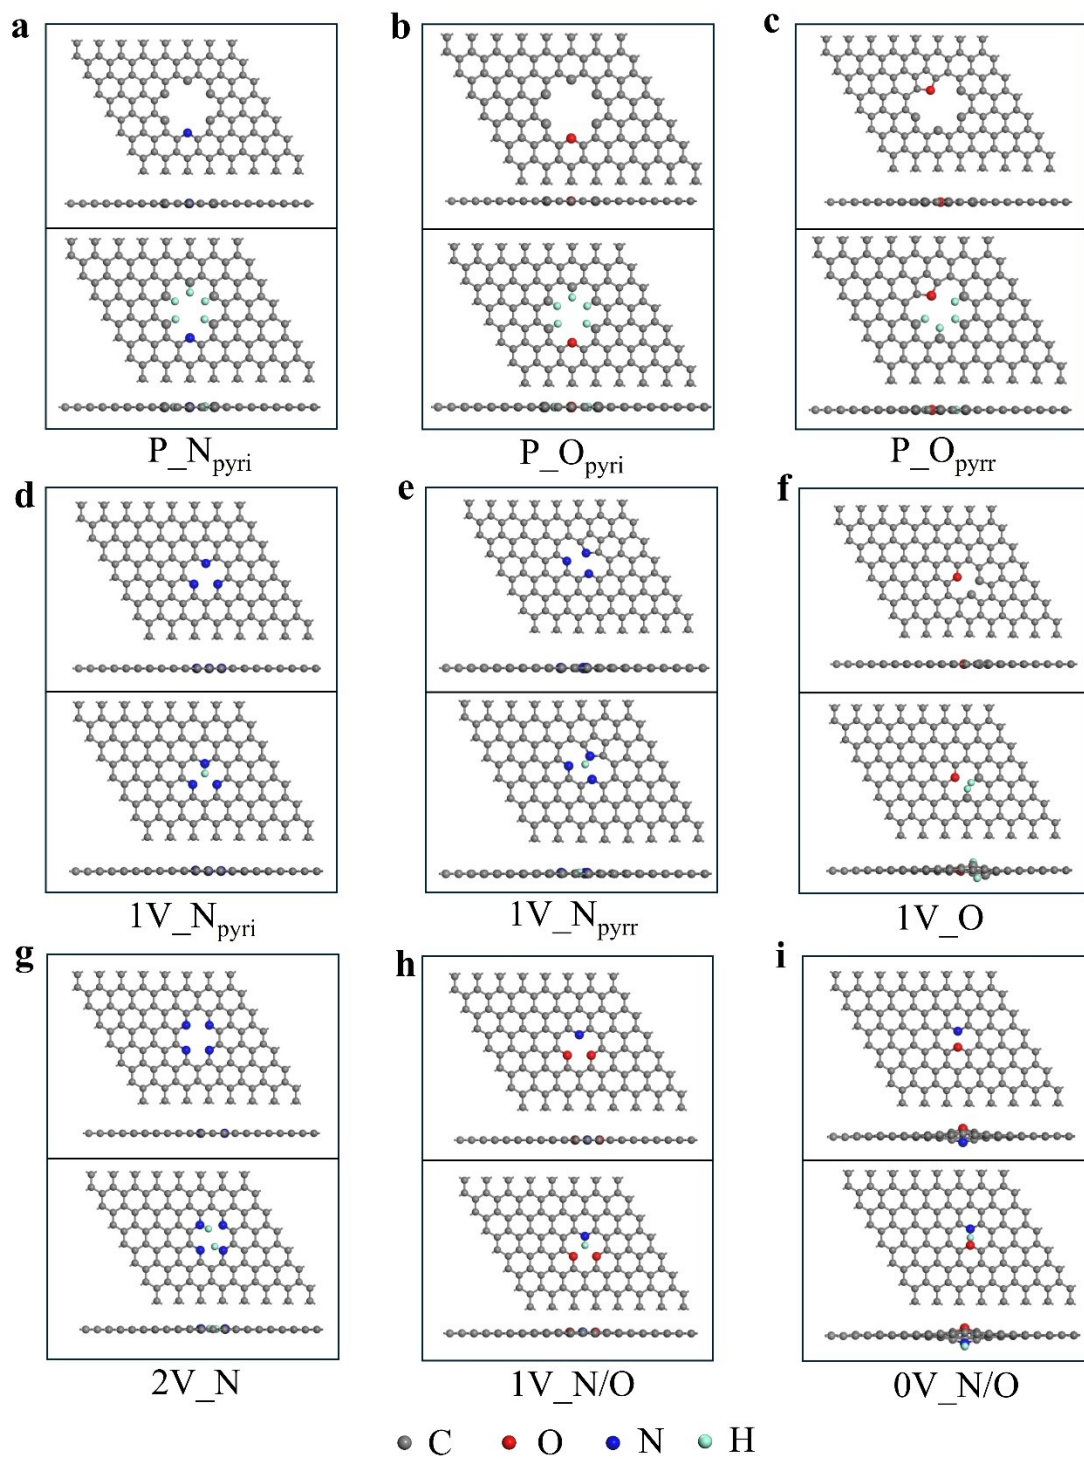

**Figure S3.** Structural models of HC before(top) and after (bottom) H-term. (a)  $P\_N\_{pyr}$ , (b)  $P\_O\_{pyr}$ , (c)  $P\_O\_{pyr}$ , (d)  $1V\_N\_{pyr}$ , (e)  $1V\_N\_{pyr}$ , (f)  $1V\_O$ , (g)  $2V\_N$ , (h)  $1V\_N/O$ , and (i)  $0V\_N/O$ .

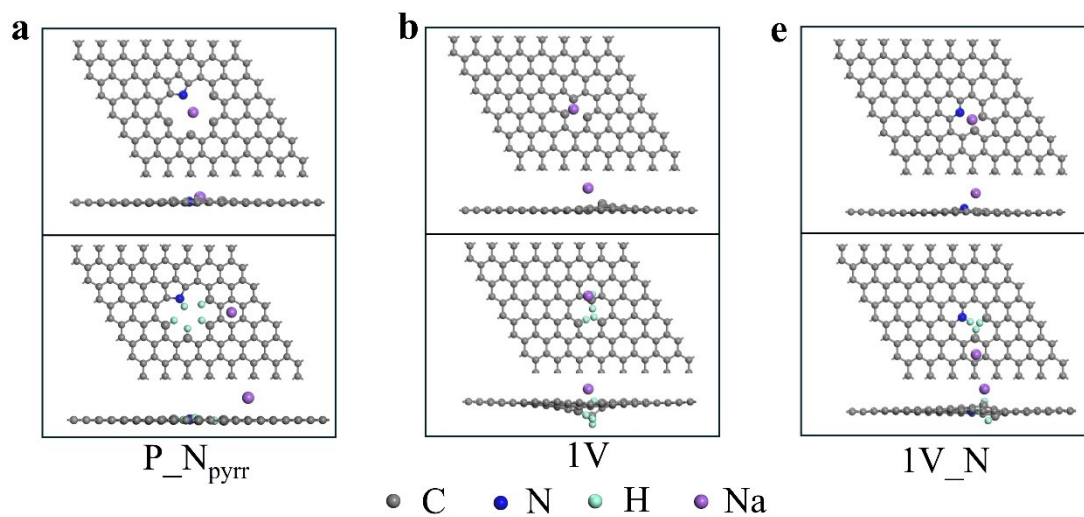

**Figure S4.** Structural models of Na adsorption on HC before (top) and after (bottom) H-term. (a) P\_N<sub>pyrr</sub>, (b) 1V, and (c) 1V\_N.

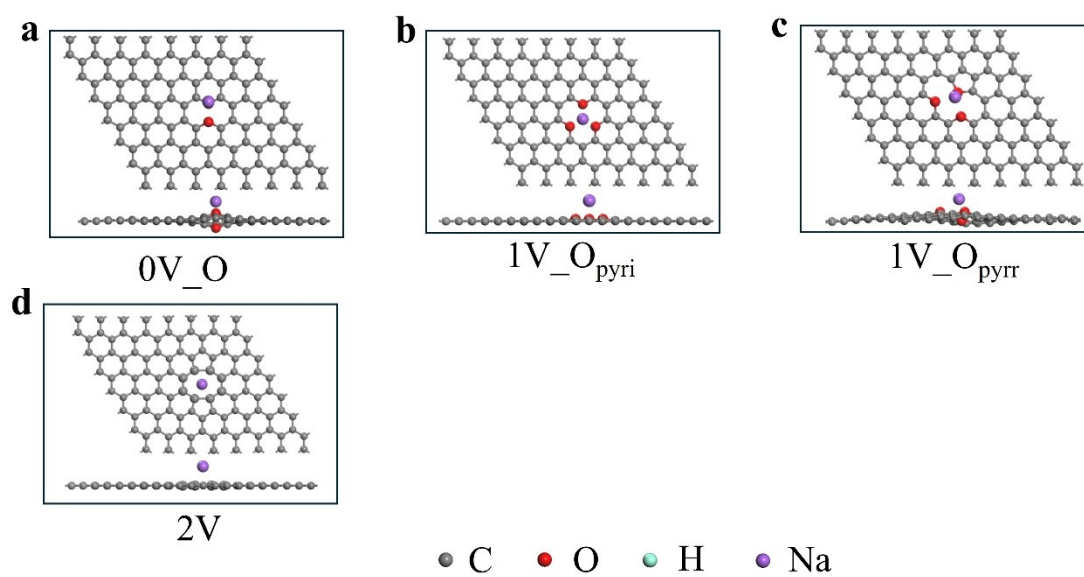

**Figure S5.** Structural models of Na adsorption on HC (a) OV\_O, (b) 1V\_O<sub>pyri</sub>, (c) 1V\_O<sub>pyrr</sub>, and (d) 2V.

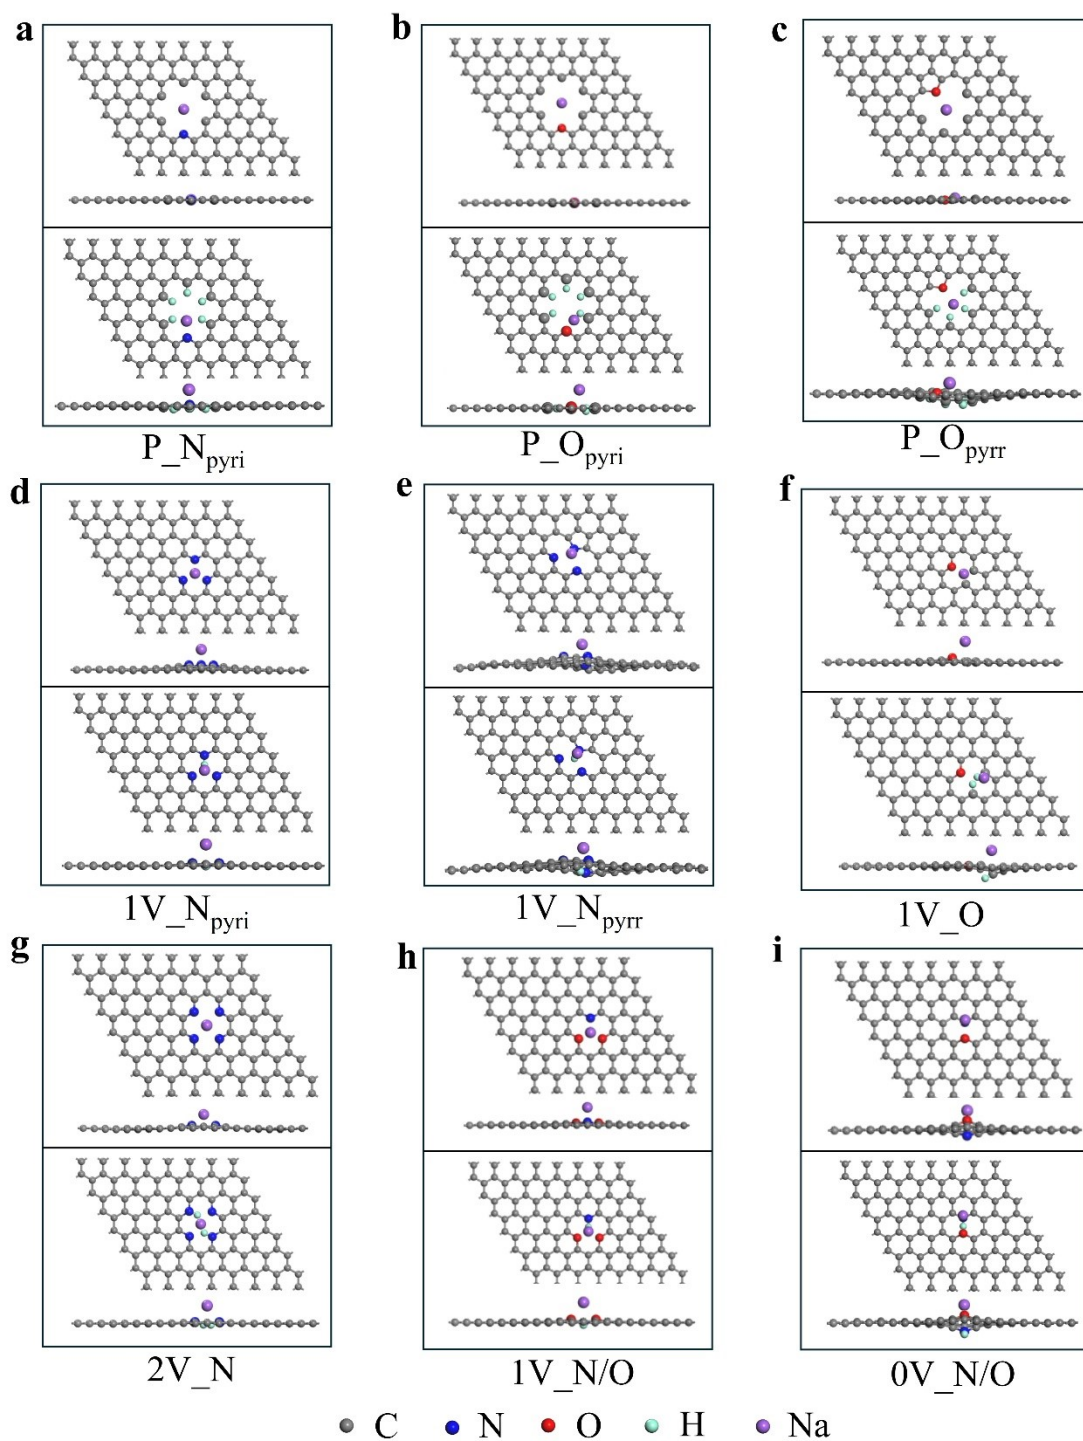

**Figure S6.** Structural models of Na adsorption on HC before (top) and after (bottom) H-term. (a)  $P\_N\_{pyri}$ , (b)  $P\_O\_{pyri}$ , (c)  $P\_O\_{pyrr}$ , (d)  $1V\_N\_{pyri}$ , (e)  $1V\_N\_{pyrr}$ , (f)  $1V\_O$ , (g)  $2V\_N$ , (h)  $1V\_N/O$ , and (i)  $0V\_N/O$ .

**Table S1.**  $E_{ads}(\text{CDS, eV})$ ,  $E_{ads}(\text{RDS, eV})$ , and  $\Delta E_{ads}(\text{eV})$  values for the 16 HC structure models.

|                      | $E_{ads}(\text{CDS, eV})$ | $E_{ads}(\text{RDS, eV})$ | $\Delta E_{ads}(\text{eV})$ |
|----------------------|---------------------------|---------------------------|-----------------------------|
| P_N <sub>pyrr</sub>  | -2.77                     | 0.32                      | 3.09                        |
| P_N <sub>pyri</sub>  | -2.66                     | -0.09                     | 2.57                        |
| P_O <sub>pyrr</sub>  | -2.46                     | 0.08                      | 2.54                        |
| P_O <sub>pyri</sub>  | -2.17                     | 0.14                      | 2.31                        |
| 1V_N                 | -1.51                     | 0.46                      | 1.97                        |
| 1V                   | -0.95                     | 0.16                      | 1.11                        |
| 1V_N <sub>pyri</sub> | -1.92                     | -0.09                     | 1.83                        |
| 2V_N                 | -2.24                     | 0.04                      | 2.27                        |
| 1V_N <sub>pyrr</sub> | -1.83                     | -0.59                     | 1.25                        |
| 1V_N/O               | -0.39                     | 0.41                      | 0.79                        |
| 0V_N/O               | -0.54                     | 0.17                      | 0.71                        |
| 1V_O                 | 0.04                      | 0.41                      | 0.37                        |
| 2V                   | -0.70                     | /                         | /                           |
| 0V_O                 | 0.17                      | /                         | /                           |
| 1V_O <sub>pyri</sub> | -0.01                     | /                         | /                           |
| 1V_O <sub>pyrr</sub> | -0.16                     | /                         | /                           |



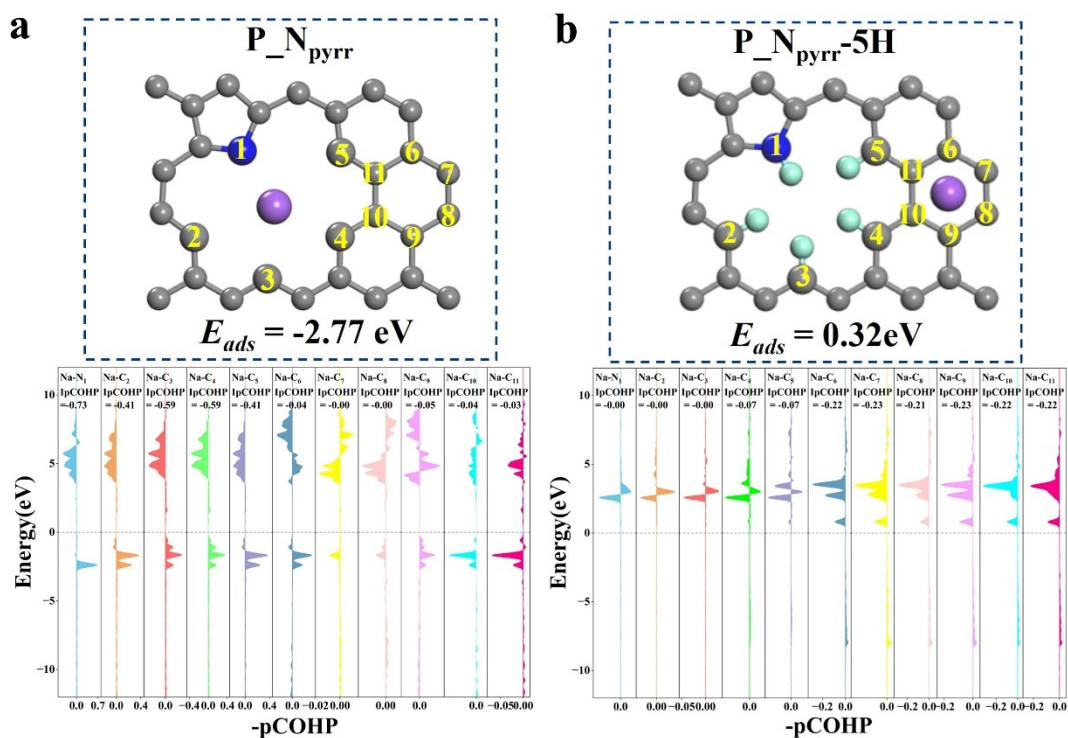

**Figure S7.** pCOHP and IpCOHP curves of ten Na-C and one Na-N bonds in (a) P\_N<sub>pyrr</sub> and (b) P\_N<sub>pyrr</sub>-5H.

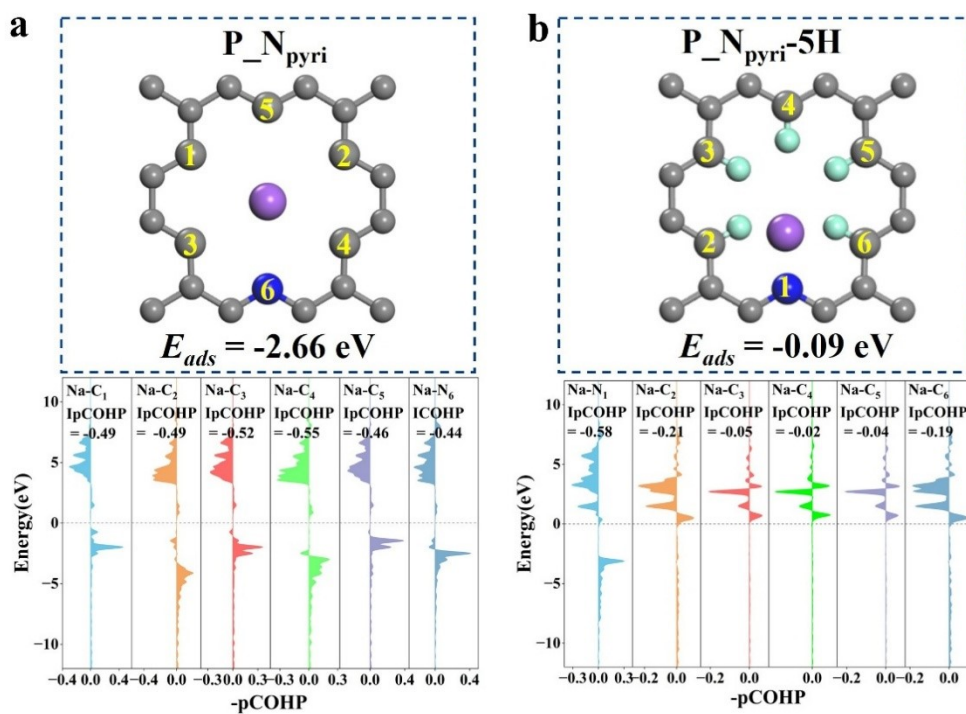

**Figure S8.** pCOHP and IpCOHP curves of five Na-C and one Na-N bonds in (a) P\_N<sub>pyri</sub> and (b) P\_N<sub>pyri</sub>-5H.

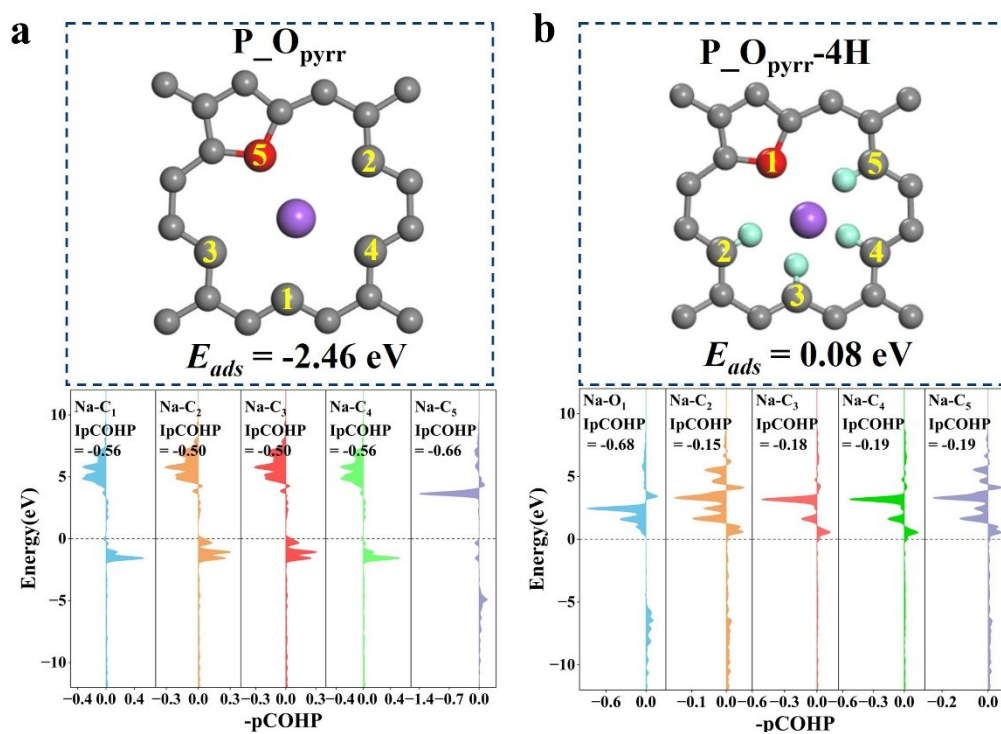

**Figure S9.** pCOHP and IpCOHP curves of four Na-C and one Na-O bonds in (a) P\_O<sub>pyrr</sub> and (b) P\_O<sub>pyrr</sub>-4H.

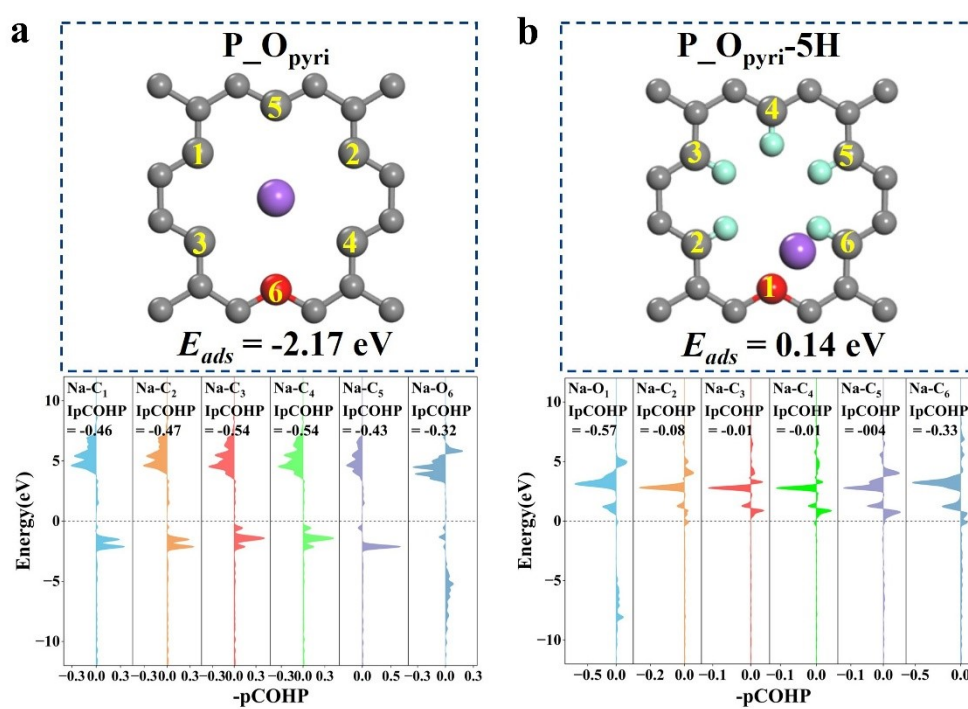

**Figure S10.** pCOHP and IpCOHP curves of five Na-C and one Na-O bonds in (a) P\_O<sub>pyri</sub> and (b) P\_O<sub>pyri</sub>-5H.



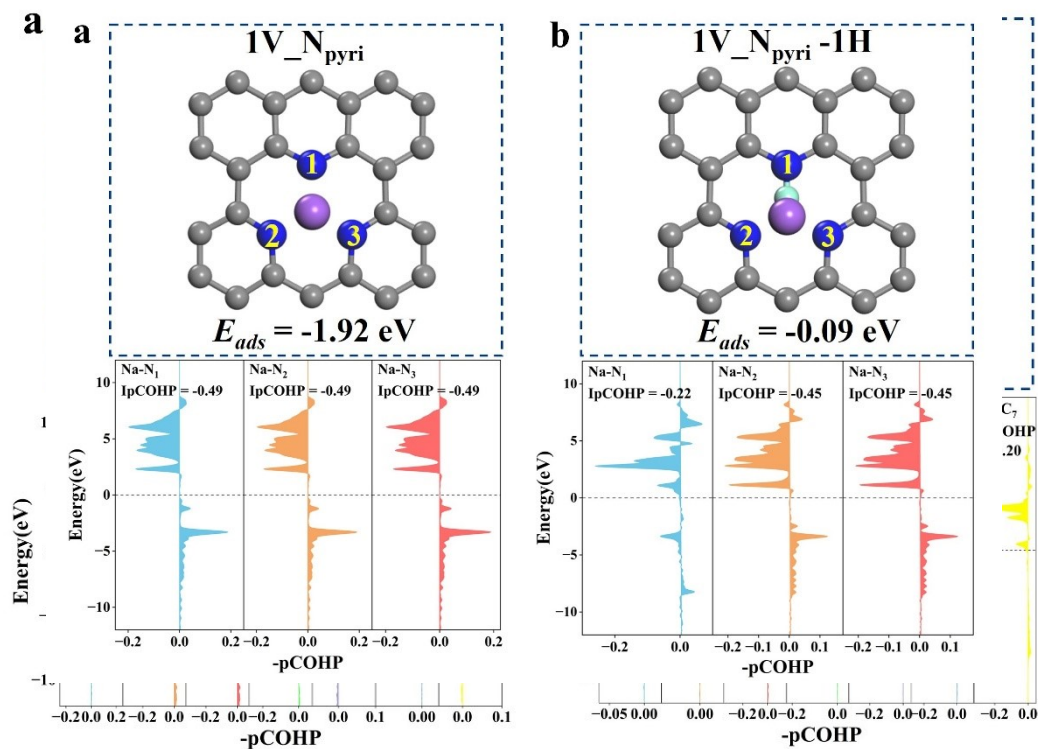

**Figure S11.** pCOHP and IpCOHP curves of one Na-N and six Na-C bonds in (a)  $1V\_N$  and (b)  $1V\_N-3H$ .

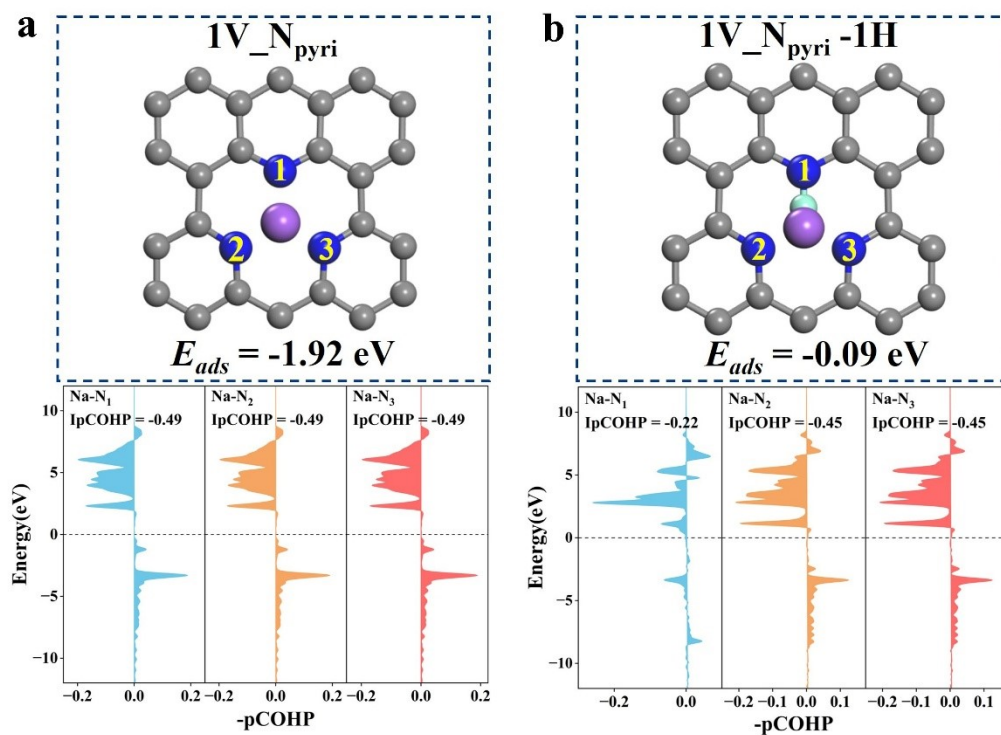

**Figure S12.** pCOHP and IpCOHP curves of three Na-N bonds in (a)  $1V\_N_{pyri}$  and (b)  $1V\_N_{pyri}-1H$ .

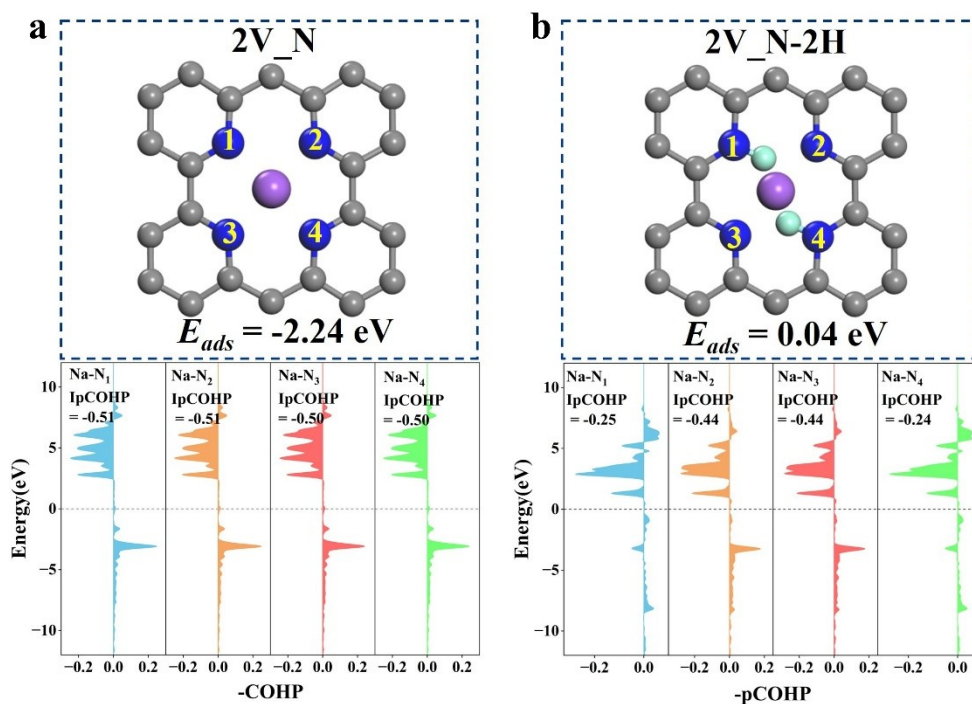

**Figure S13.** pCOHP and IpCOHP curves of four Na-N bonds in (a) 2V\_N and (b) 2V\_N-2H.

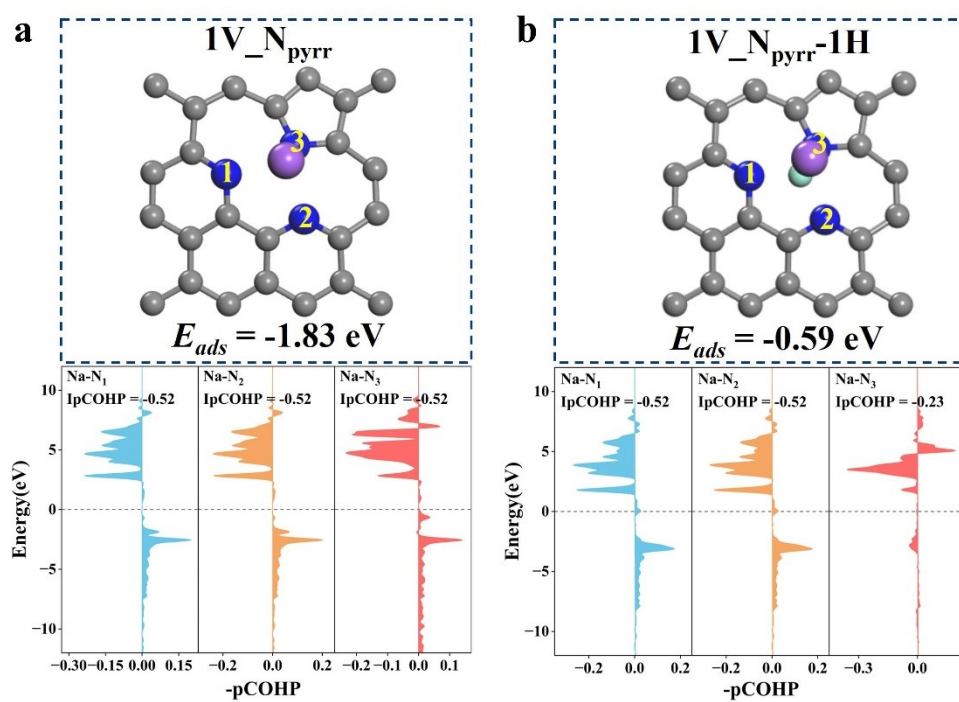

**Figure S14.** pCOHP and IpCOHP curves of three Na-N bonds in (a) 1V\_N<sub>pyr</sub> and (b) 1V\_N<sub>pyr</sub>-1H.

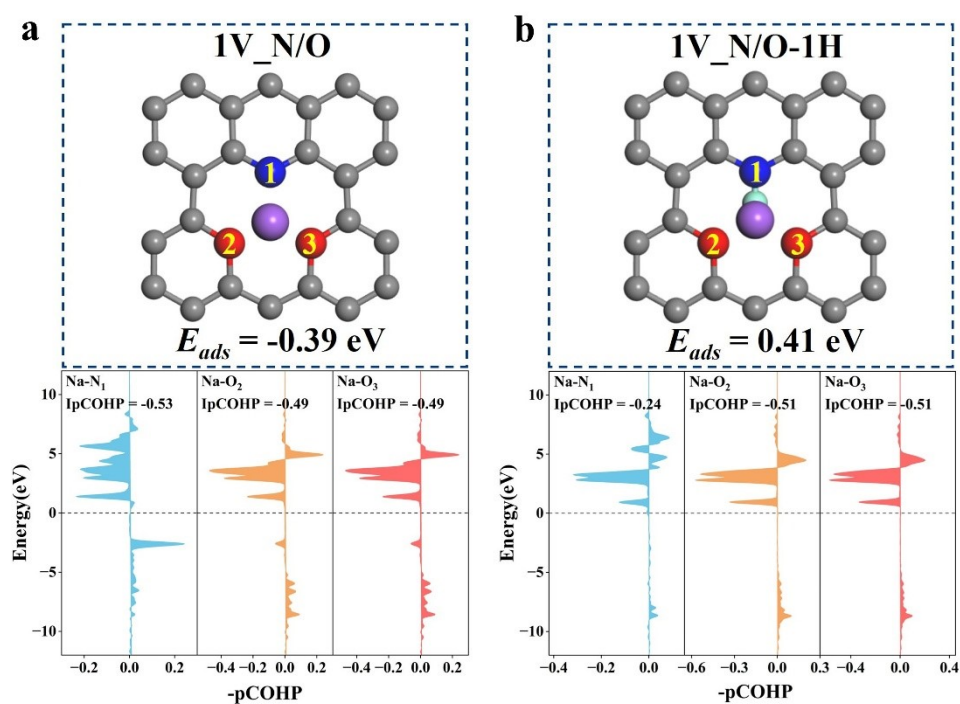

**Figure S15.** pCOHP and IpCOHP curves of one Na-N and two Na-O bonds in (a) 1V\_N/O and (b) 1V\_N/O-1H.

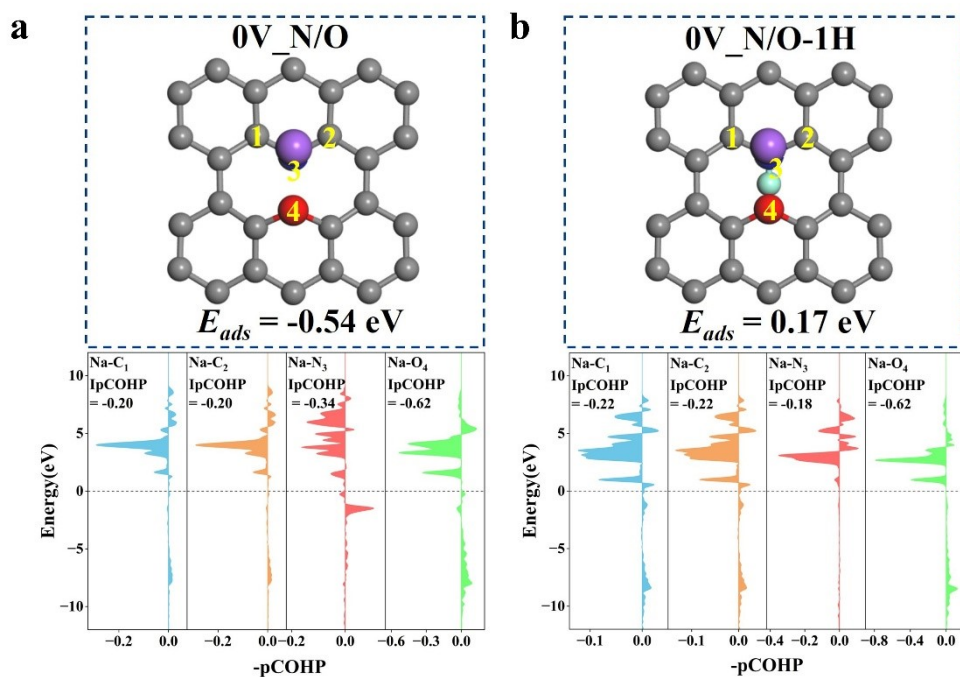

**Figure S16.** pCOHP and IpCOHP curves of two Na-

C, one Na-N and one Na-O bonds in (a) 0V\_N/O and (b) 0V\_N/O-1H.

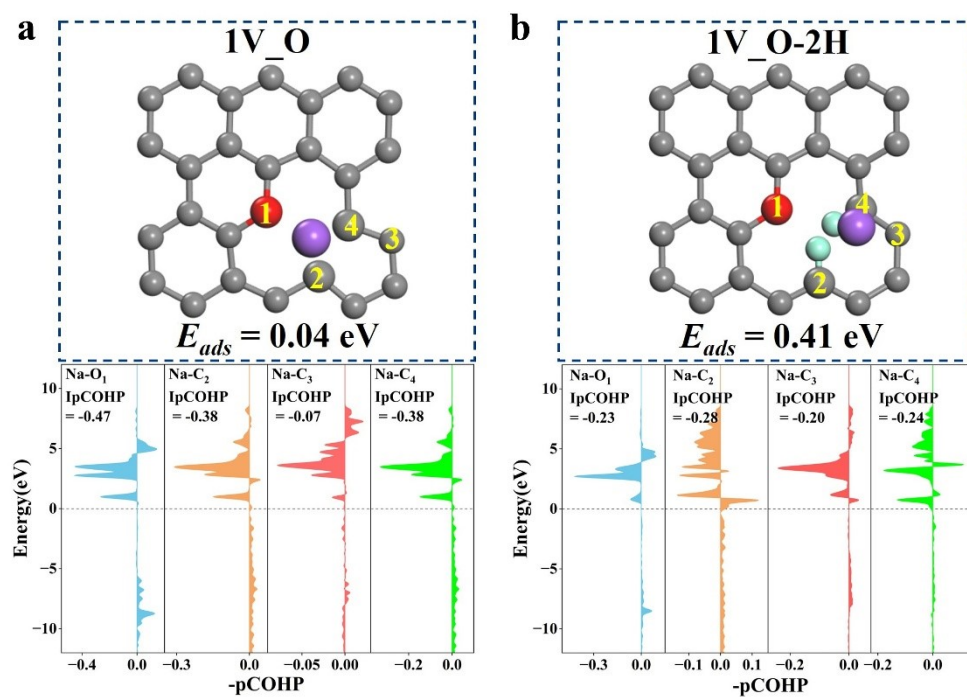

**Figure S17.** pCOHP and IpCOHP curves of three Na-C and one Na-O bonds in (a) 1V\_O and (b) 1V\_O-2H.

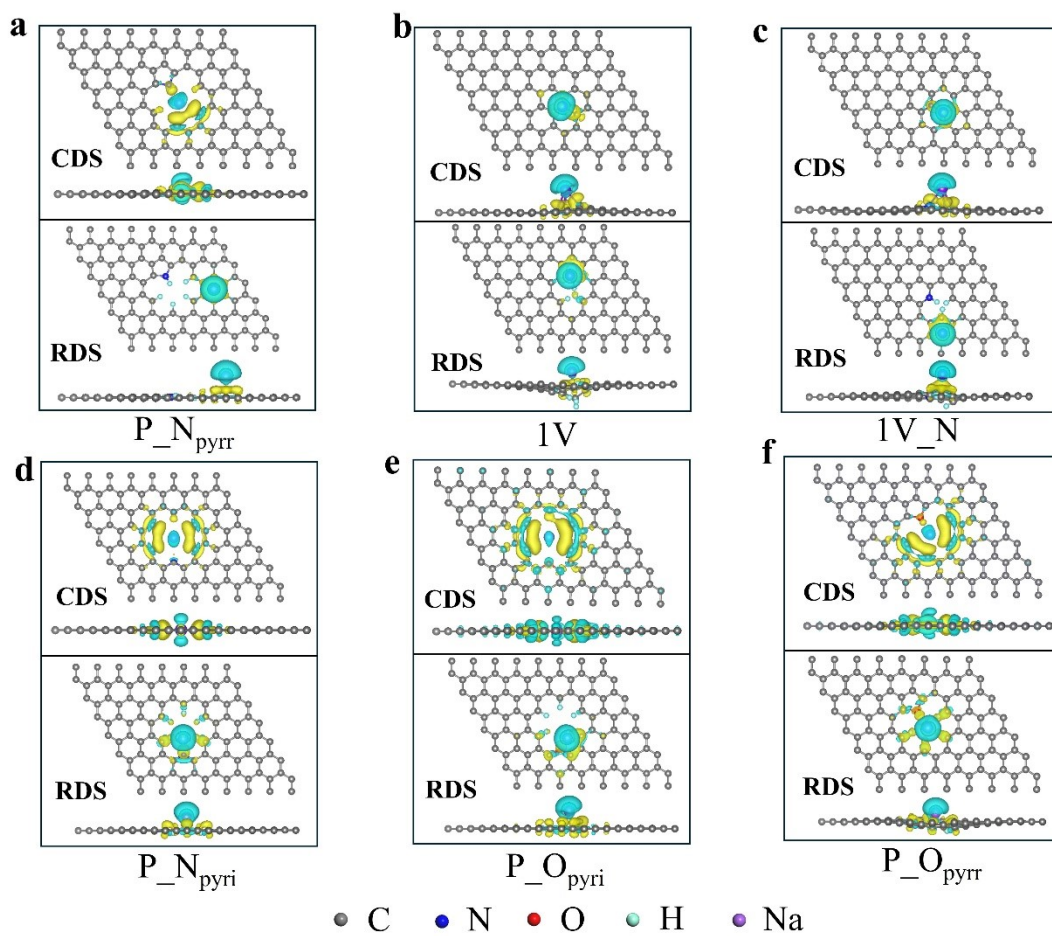

**Figure S18.** Differential charge density maps of Na adsorption on (a) P\_N<sub>pyr</sub>, (b) 1V, (c) 1V\_N, (d) P\_N<sub>pyri</sub>, (e) P\_O<sub>pyri</sub>, and (f) P\_O<sub>pyr</sub> (top and side views; isosurface = 0.002 e/Å<sup>3</sup>).



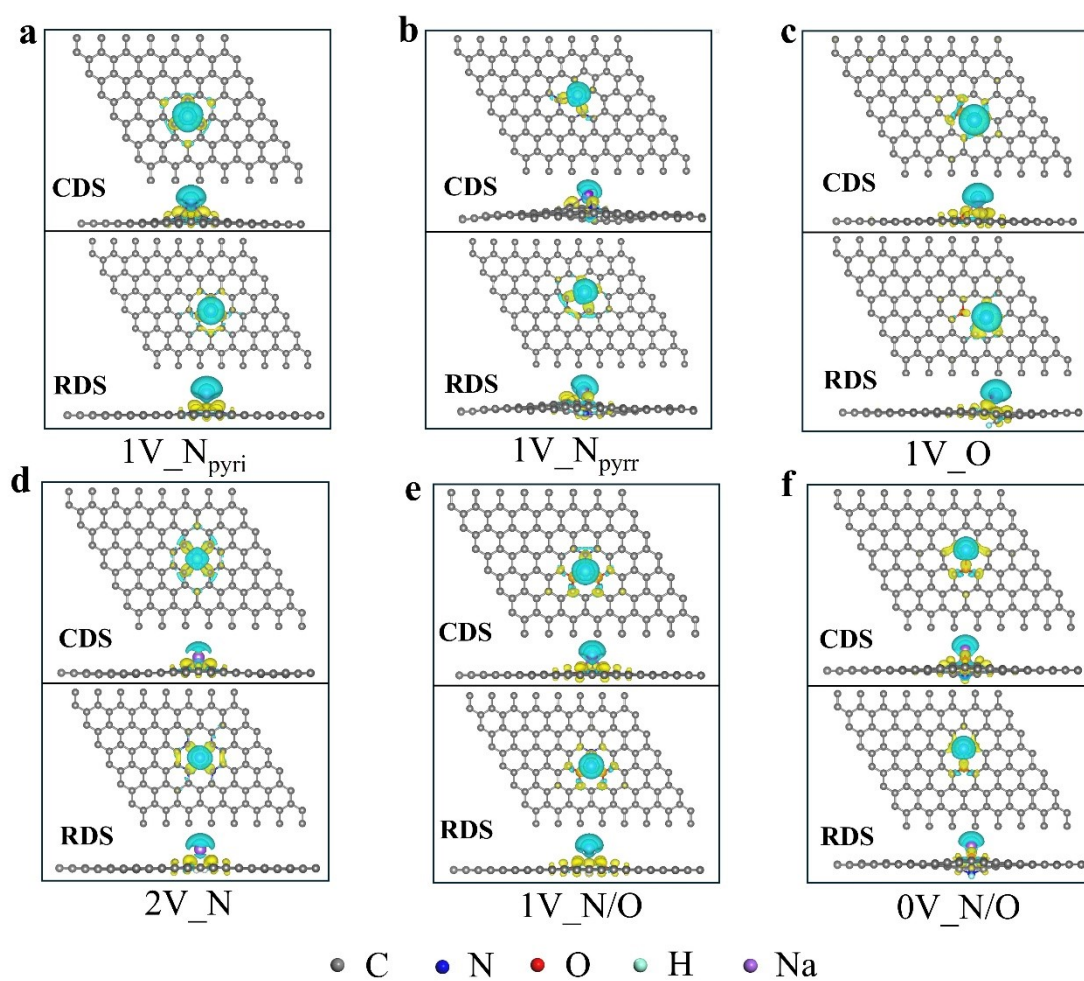

**Figure S19.** Differential charge density maps of Na adsorption on (a) 1V\_N<sub>pyrri</sub>, (b) 1V\_N<sub>pyrr</sub>, (c) 1V\_O, (d) 2V\_N, (e) 1V\_N/O, (f) 0V\_N/O. (top and side views; isosurface = 0.002 e/Å<sup>3</sup>).

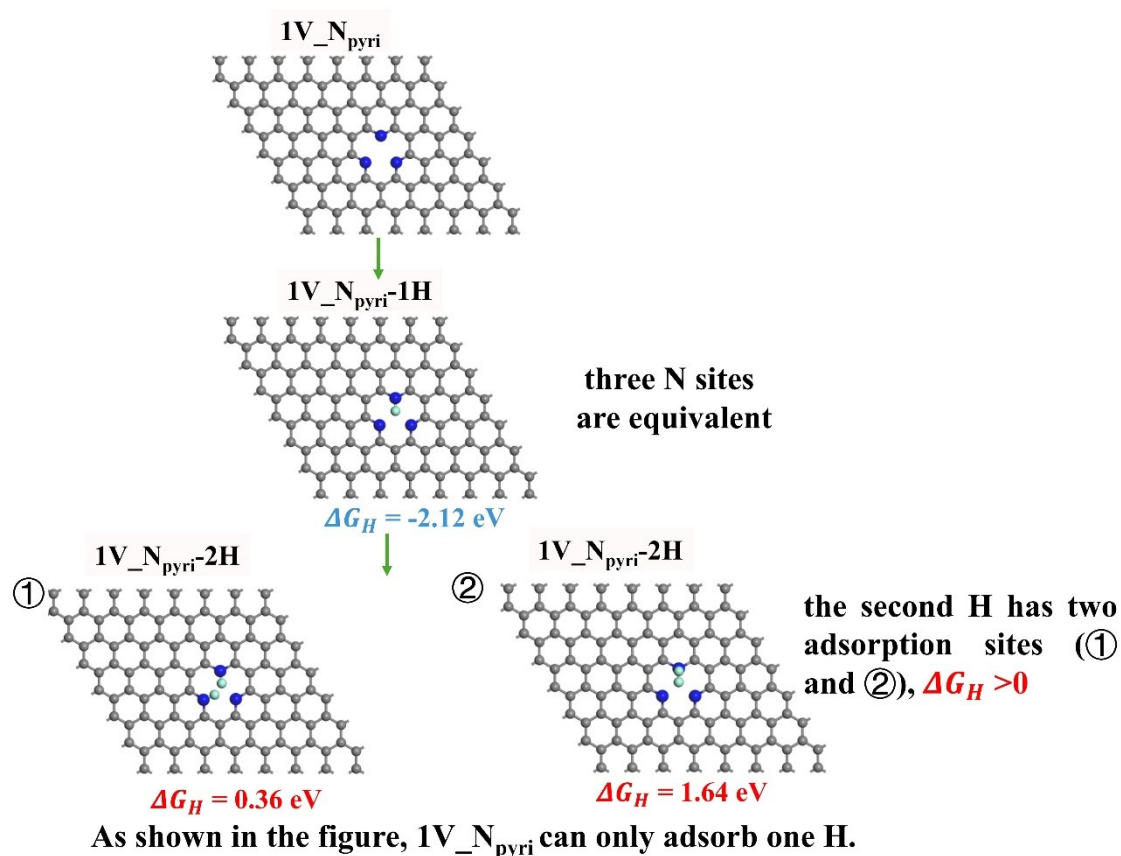

**Figure S20.** Schematic illustration of the stepwise H adsorption approach for determining the RDS configuration of  $1V\_N_{\text{pyri}}$ . The calculations reveal three equivalent pyridinic N sites for the first H addition. For the second H, although two candidate adsorption positions exist, both yield  $\Delta G_H > 0$ , confirming that only one H atom can be incorporated into the defect structure.

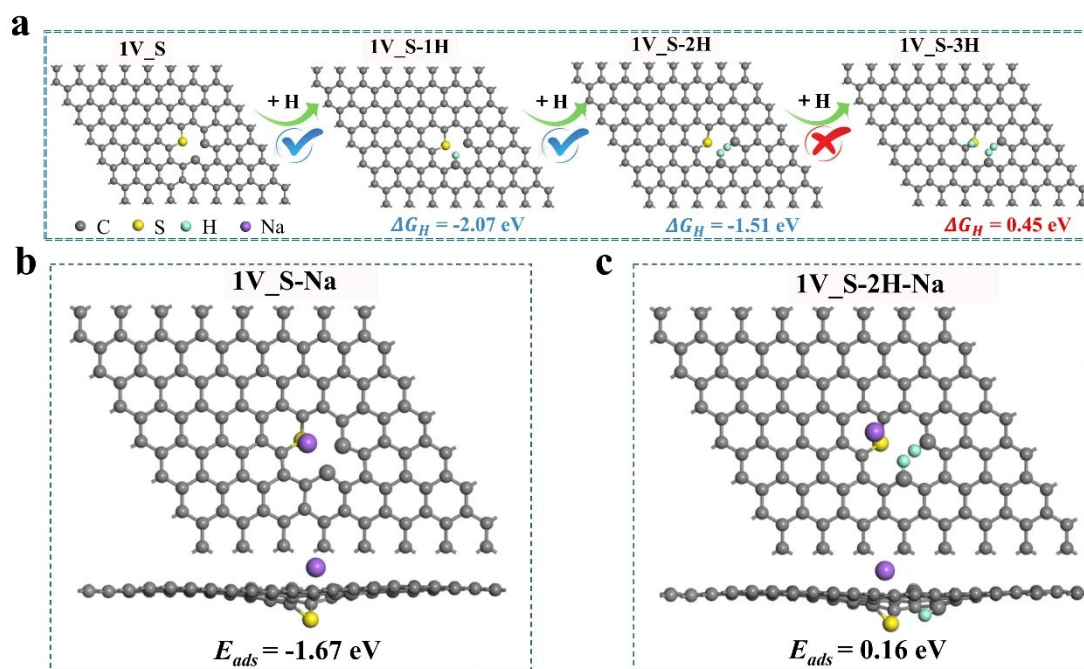

**Figure S21.** (a) Schematic illustration of the stepwise H adsorption approach used to determine the RDS configuration of 1V\_S. Structural models of Na adsorption on (b) the unpassivated 1V\_S defect and (c) the H-terminated 1V\_S-2H configuration.

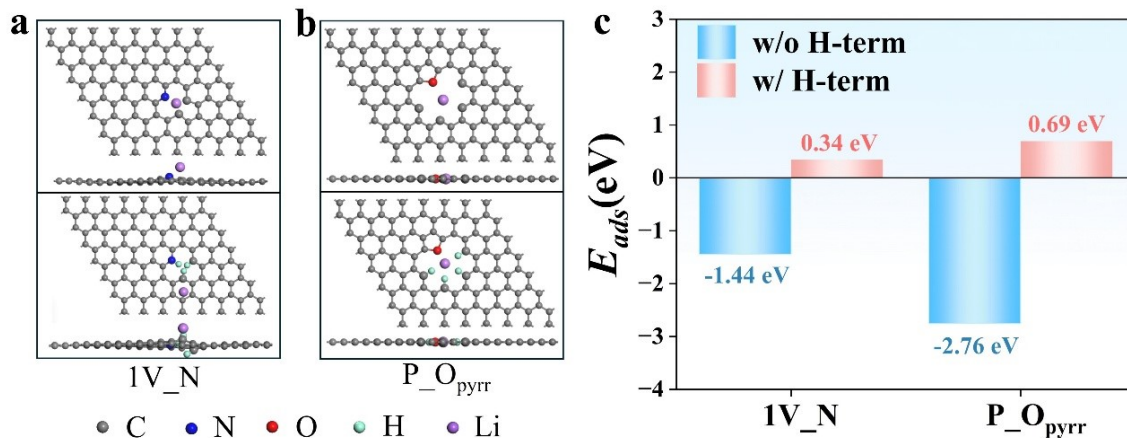

**Figure S22.** Structural models of Li adsorption on HC before (top) and after (bottom) H-term for (a) 1V\_N and (b) P\_O<sub>pyrr</sub>, (c) Calculated  $E_{ads}$  for 1V\_N and P\_O<sub>pyrr</sub> defects using CDS and RDS models.

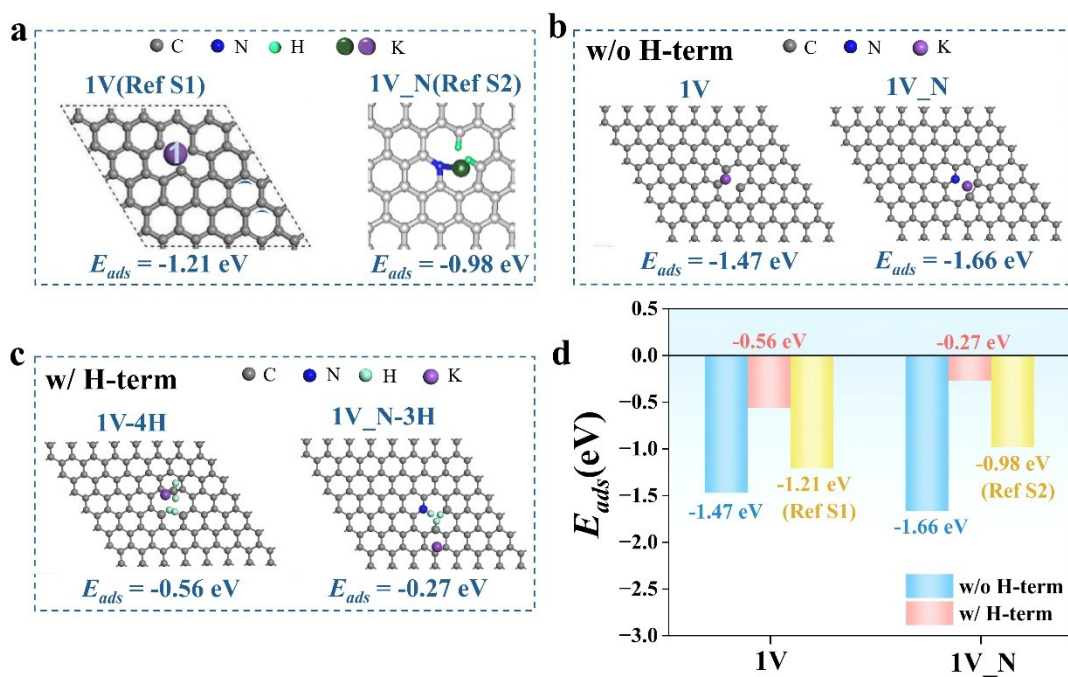

**Figure S23.** Structural models of K adsorption on 1V and 1V<sub>N</sub> defects: (a) reference structures reported in the literature, (b) configurations without H-term, and (c) configurations with H-term. (d) Calculated  $E_{ads}$  for the 1V and 1V<sub>N</sub> defects using the CDS and RDS models, shown in comparison with the reference values.<sup>S1, S2</sup>

## References

- S1. S. Zhao, K. Yan, J. Liang, Q. Yuan, J. Zhang, B. Sun, P. Munroe and G. Wang, *Adv. Funct. Mater.*, 2021, **31**, 2102060.
- S2. Z. Zhu, Y. Men, W. Zhang, Y. Guo, X. Zeng, Y. Zhang, C. Tang, X. Li and Y. Zhang, *SusMat.*, 2025, **5**, e70017.
